# Supplementary figures and images for: Broadly sampled multigene trees of eukaryotes
Source: Springer Nature journal article supplement (doi:10.1186/1471-2148-8-14), 2008-01-18

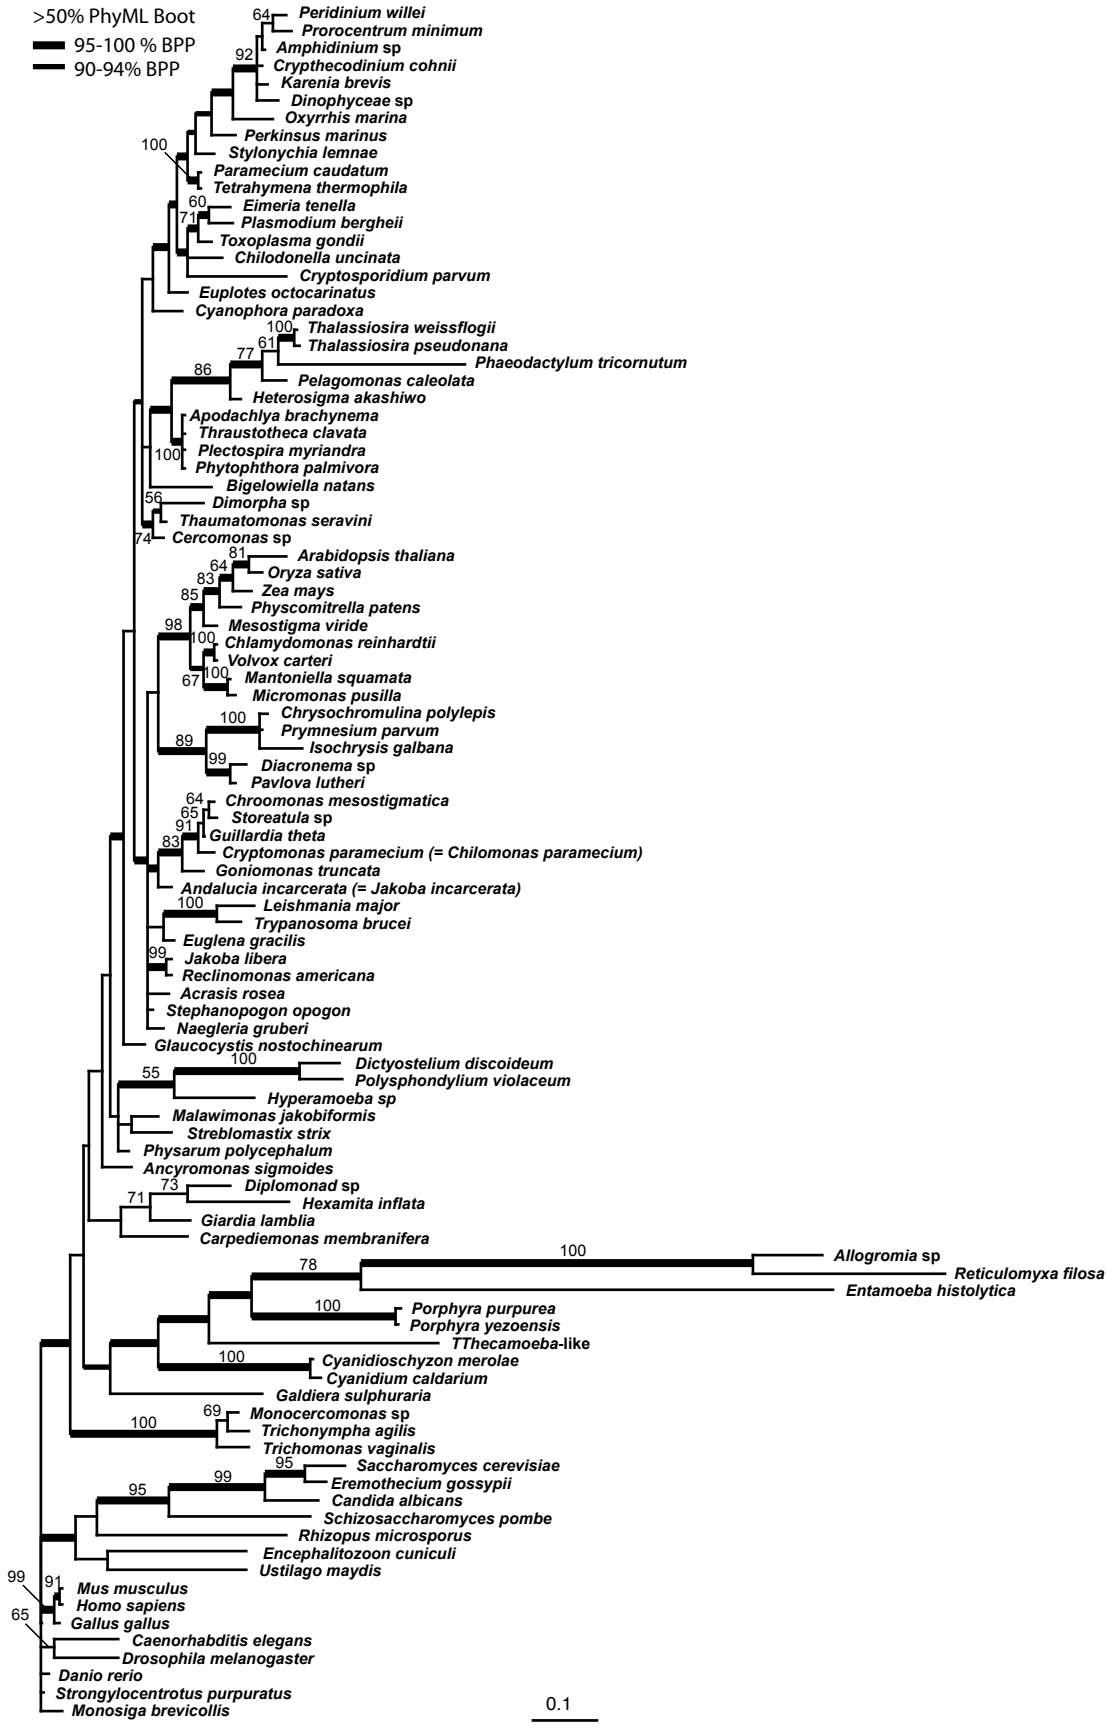

Supplement: Additional file 12 [file 1471-2148-8-14-s12.pdf]

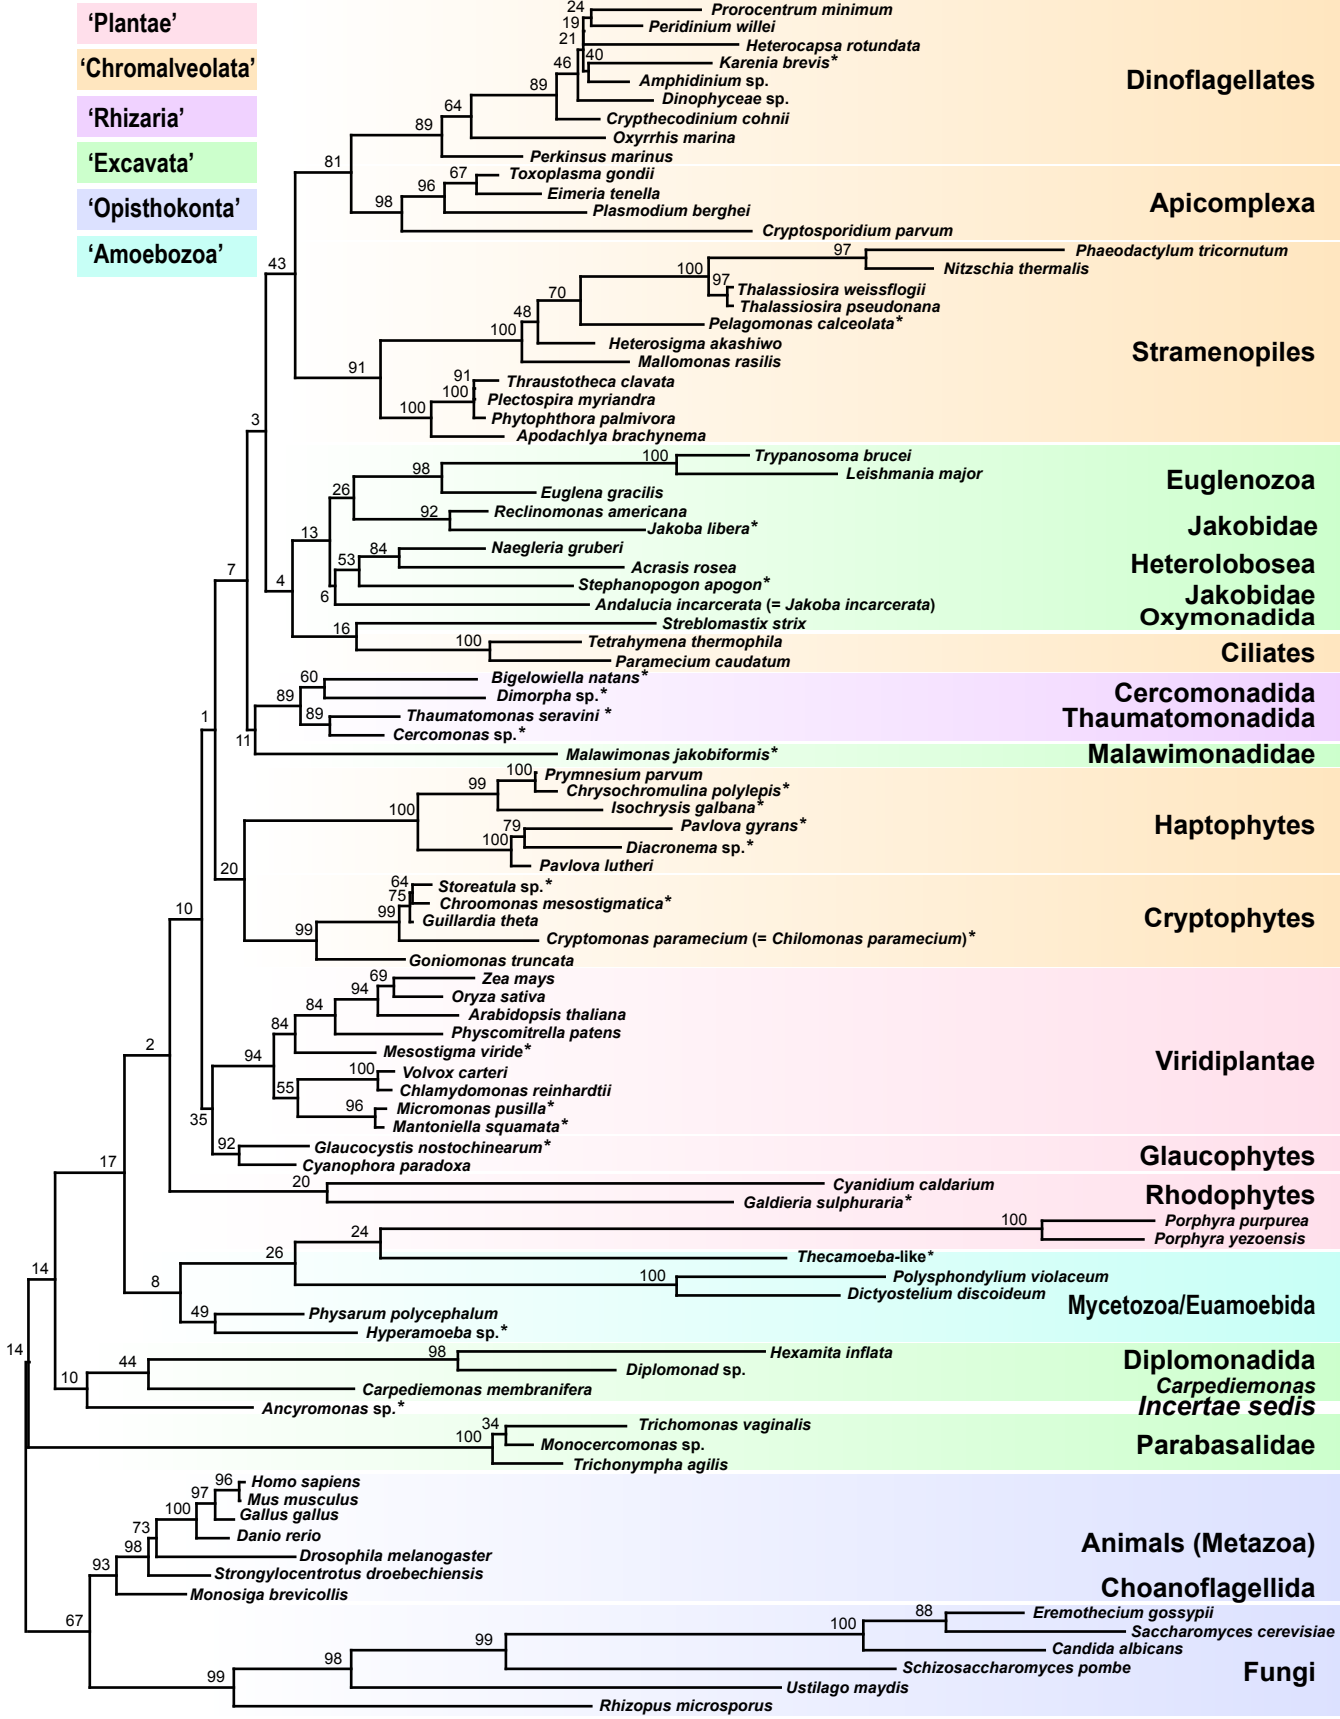

Supplement: Additional file 9 [file 1471-2148-8-14-s9.pdf]
